RESEARCH ARTICLE

# Epidemiological and Clinical Features of Severe Fever with Thrombocytopenia Syndrome in Japan, 2013–2014

Hirofumi Kato<sup>1,2,3\*</sup>, Takuya Yamagishi<sup>3\*</sup>, Tomoe Shimada<sup>3</sup>, Tamano Matsui<sup>3</sup>, Masayuki Shimojima<sup>4</sup>, Masayuki Saijo<sup>4</sup>, Kazunori Oishi<sup>2,3\*</sup>, SFTS epidemiological research group-Japan<sup>†</sup>

**1** Field Epidemiology Training Program (FETP), National Institute of Infectious Diseases, Shinjuku, Tokyo, Japan, **2** Division of Global Infectious Diseases, Department of Infection and Epidemiology, Graduate School of Medicine, Tohoku University, Sendai, Miyagi, Japan, **3** Infectious Disease Surveillance Center, National Institute of Infectious diseases, Shinjuku, Tokyo, Japan, **4** Department of Virology I, National Institute of Infectious diseases, Shinjuku, Tokyo, Japan

\* These authors contributed equally to this work.

† Membership of the SFTS epidemiological research group-Japan is provided in the Acknowledgments.

\* oishik@niid.go.jp

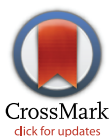

**OPEN ACCESS**

**Citation:** Kato H, Yamagishi T, Shimada T, Matsui T, Shimojima M, Saijo M, et al. (2016) Epidemiological and Clinical Features of Severe Fever with Thrombocytopenia Syndrome in Japan, 2013–2014. PLoS ONE 11(10): e0165207. doi:10.1371/journal.pone.0165207

**Editor:** Zheng Xing, University of Minnesota College of Veterinary Medicine, UNITED STATES

**Received:** May 20, 2016

**Accepted:** October 7, 2016

**Published:** October 24, 2016

**Copyright:** © 2016 Kato et al. This is an open access article distributed under the terms of the [Creative Commons Attribution License](https://creativecommons.org/licenses/by/4.0/), which permits unrestricted use, distribution, and reproduction in any medium, provided the original author and source are credited.

**Data Availability Statement:** All relevant data are within the paper and its supporting information files.

**Funding:** This research was supported by grants for Research on Emerging and Re-emerging Infectious Diseases from the Ministry of Health, Labour and Welfare of Japan [H25-Shinko-Shitei-009, <http://www.mhlw.go.jp/>] and the Research Program on Emerging and Re-emerging Infectious Diseases from the Japan Agency for Medical Research and Development [<http://www.amed.go.jp/>]. The funders had no role in study design, data

## Abstract

Although severe fever with thrombocytopenia syndrome (SFTS) was first reported from Japan in 2013, the precise clinical features and the risk factors for SFTS have not been fully investigated in Japan. Ninety-six cases of severe fever with thrombocytopenia syndrome (SFTS) were notified through the national surveillance system between April 2013 and September 2014 in Japan. All cases were from western Japan, and 82 cases (85%) had an onset between April and August. A retrospective observational study of the notified SFTS cases was conducted to identify the clinical features and laboratory findings during the same period. Of 96 notified cases, 49 (51%) were included in this study. Most case-patients were of advanced age (median age 78 years) and were retired or unemployed, or farmers. These case-patients had a history of outdoor activity within 2 weeks before the onset of illness. The median serum C-reactive protein concentration was slightly elevated at admission. Fungal infections such as invasive aspergilosis were found in 10% of these case-patients. Hemophagocytosis was observed in 15 of the 18 case-patients (83%) whose bone marrow samples were available. Fifteen cases were fatal, giving a case-fatality proportion of 31%. The proportion of neurological abnormalities and serum concentrations of lactate dehydrogenase and aspartate aminotransferase were significantly higher in the fatal cases than in the nonfatal cases during hospitalization. Appearance of neurological abnormality may be useful for predicting the prognosis in SFTS patients.

collection and analysis, decision to publish, or preparation of the manuscript.

**Competing Interests:** The authors have declared that no competing interests exist.

## Introduction

Severe fever with thrombocytopenia syndrome (SFTS) is a tick-borne infectious disease caused by SFTS virus (SFTSV), which is a newly identified bunyavirus in the genus *Phlebovirus* of the family *Bunyaviridae* [1]. SFTS was first reported from Central and Northeast China in 2009 [2], and about 2,500 cases were reported from 11 provinces in China in 2010–2012 [3]. SFTS is considered endemic to Japan and South Korea based on the identification of SFTS patients in 2013 [4,5].

SFTSV is found in ticks such as *Haemaphysalis longicornis* in China and South Korea [6,7], and *Amblyomma testudinarium* and *Ixodes nipponensis* in South Korea [7], which indicates the potential vectors of SFTSV. In Japan, SFTSV has been recently detected in several species of ticks including *A. testudinarium* and *H. longicornis* (Morikawa S. Personal communication). Human-to-human transmission of SFTSV through close contact with blood and/or body secretion of patients has been reported [8–11].

After the first SFTS patient was identified in Yamaguchi prefecture, western Japan, in 2013 [4], an interim case definition was introduced to implement ad hoc surveillance, including retrospective case detection, to target primarily hospitalized patients in Japan [12]. Since March 3, 2013, physicians have been legally required to notify all confirmed cases of SFTS to their local public health center immediately after diagnosis, and the local public health center then reports the case information to the Ministry of Health, Labour and Welfare through the national surveillance system, National Epidemiological Surveillance of Infectious Diseases (NESID), in compliance with the Infectious Diseases Control Law. Subsequently, 161 confirmed SFTS cases were reported to the NESID up to December 2015. Although demographic data related to these SFTS cases have been reported to the NESID, these data were insufficient to demonstrate the precise clinical features and the risk factors for SFTS. We therefore conducted a retrospective observational study to identify the precise epidemiological and clinical features of SFTS in Japan.

## Methods

### Study Design and Data Collection

The physicians who notified NESID about all cases of SFTS with onset between March 1, 2013 and September 30, 2014 were asked to participate in this study by completing a questionnaire sent by postal mail. Demographic data, social history, history of outdoor activity 2 weeks before the onset of illness, clinical symptoms, and laboratory data of the SFTS patients were collected through the questionnaires. The physicians who agreed to participate in this study collected the information about each patient from medical charts or direct interview with the case-patient or a family member of the case-patient by telephone after obtaining informed consent from the case-patient and/or family member. Clinical information and laboratory data during the acute phase within 2 weeks after the onset of illness were collected. Basic demographic data about each SFTS patient during the study period were extracted from the NESID database.

Proven invasive aspergillosis was diagnosed by histopathological findings of Grocott's stained lung tissue, and probable invasive aspergillosis was diagnosed by an infiltrative shadows on chest computed tomography and positive galactomannan result [13]. Oral candidiasis was diagnosed by typical clinical appearance of mucosal membrane.

### RT-PCR for SFTSV

For all cases reported to the NESID, the laboratory confirmation of SFTSV infection was performed using reverse transcription PCR (RT-PCR) in the local public health institute and/or

the National Institute of Infectious Diseases (NIID), as described previously [14]. In brief, the total RNAs were extracted from blood specimens. SFTSV genome-specific primer sets for detecting nucleoprotein region were selected, and reverse transcription step was performed under provided condition. After electrophoresis on 1% agarose gels, the PCR products with the expected sizes were visualized by staining with GelRed (Biotium, Hayward, CA). The positive-control plasmid, which provides 584 bp or 587 bp of PCR products by primer sets 1 or 2, respectively, was subjected to RT-PCR simultaneously with the specimens.

## Inclusion and exclusion criteria

Case-patients who presented any symptoms of fever and gastrointestinal symptoms or any laboratory findings including thrombocytopenia ( $<10.0 \times 10^4/\mu\text{L}$ ), leucopenia ( $<4000$  cells/ $\mu\text{L}$ ), and elevated levels of liver enzyme and were confirmed by laboratory examination for SFTSV infection. Case patients who were not confirmed by laboratory examinations or those caused by other etiologies were excluded.

## Statistical Analysis

We used Fisher's exact or the Wilcoxon rank-sum test to compare the characteristics between fatal and nonfatal cases. All *p* values were two-sided, and  $p < 0.05$  was considered significant. All data were analyzed using STATA 13<sup>®</sup> software for Windows (StataCorp LP, College Station, TX, USA).

## Ethical Statement

The research protocol was approved by the research and ethics committees of NIID (no.549). This study was carried out according to the principles expressed in the Declaration of Helsinki. The patient or guardian provided written informed consent for all cases.

## Results

### Basic Characteristics

Ninety-six cases were reported to NESID by 72 physicians during the study period. Thirty-six of the 72 physicians agreed to participate in this study. All cases were reported from the prefectures in western Japan (S1 Fig and S1 Table). All cases were diagnosed by RT-PCR; no case was diagnosed by serological assays. The characteristics of the 96 case-patients are shown in S2 Table. The overall incidence of SFTS was 0.05 cases/100,000 person-years during the study period. Most cases (82%) had an onset of disease between May and August in 2013 ( $n = 28$ ) and between April and August in 2014 ( $n = 51$ ) (S2 Fig).

The data for 49 of 96 cases (51%) were included in this study. The baseline characteristics of the case-patients are shown in Table 1. Of the 49 included cases, 21 (43%) and 28 (57%) were reported in 2013 and 2014, respectively. The numbers of total cases/ fatal cases for the regions were; respectively 22/ 6 in the Shikoku-region, 18/ 6 in the Kyusyu-region, 7/ 2 in the Chugoku-region, and 2/ 1 in the Kinki-region. The median age of case-patients was 78 years (interquartile range [IQR]: 65–84), and 32 (65%) of the case-patients were women.

Fifteen cases were fatal, which produced a high case-fatality proportion of 31%. The fatal case-patients were significantly older than the nonfatal case-patients ( $p = 0.0033$ ). No significant difference was found in age ( $p = 0.4589$ ), in sex ( $p = 0.1050$ ) or in case-fatality proportion ( $p = 0.9299$ ) between the case-patients who were included in this study ( $n = 49$ ) and those who were reported to NESID, but not included in this study ( $n = 47$ ).

**Table 1. Basic characteristics of 49 case-patients with severe fever with thrombocytopenia syndrome in Japan.**

|                                           | Total (n = 49) | Nonfatal (n = 34) | Fatal (n = 15) | p-value           |
|-------------------------------------------|----------------|-------------------|----------------|-------------------|
| Sex                                       |                |                   |                |                   |
| Male                                      | 17 (35%)       | 12 (71%)          | 5 (29%)        |                   |
| Female                                    | 32 (65%)       | 22 (69%)          | 10 (31%)       |                   |
| Age, y [IQR]                              | 78 [65–84]     | 69 [62–78]        | 83 [79–87]     | 0.0033*           |
| 40–49                                     | 2 (4%)         | 2 (6%)            | 0 (0%)         |                   |
| 50–59                                     | 6 (12%)        | 5 (15%)           | 1 (7%)         |                   |
| 60–69                                     | 11 (22%)       | 11 (32%)          | 0 (0%)         |                   |
| 70–79                                     | 10 (20%)       | 6 (18%)           | 4 (27%)        |                   |
| 80–89                                     | 17 (35%)       | 9 (26%)           | 8 (53%)        |                   |
| 90–99                                     | 3 (6%)         | 1 (3%)            | 2 (13%)        |                   |
| Underlying medical condition              |                |                   |                |                   |
| Hypertension                              | 23 (47%)       | 16 (47%)          | 7 (47%)        | 1.00 <sup>†</sup> |
| Diabetes                                  | 12 (24%)       | 8 (24%)           | 4 (27%)        | 1.00 <sup>†</sup> |
| Cancer                                    | 2 (4%)         | 1 (3%)            | 1 (7%)         | 0.52 <sup>†</sup> |
| Time from onset to initial visit, d [IQR] | 3 [2–5]        | 3 [3–5]           | 4 [1–6]        | 0.61*             |
| Time from onset to admission, d [IQR]     | 4 [2–5]        | 4 [4–5]           | 4 [1–6]        | 0.69*             |
| Time from onset to death, d [IQR]         | –              | –                 | 8 [5–11]       |                   |
| Entering an ICU                           | 14 (29%)       | 7 (21%)           | 7 (47%)        | 0.09 <sup>†</sup> |

Unless indicated otherwise, the data are expressed as number (percentage).

Note: Abbreviations. y, year; IQR, interquartile range; d, day; ICU, intensive care unit.

\*Wilcoxon rank-sum test

<sup>†</sup>Fisher's exact test

doi:10.1371/journal.pone.0165207.t001

Of the 49 case-patients included in this study, 29 (59%) were unemployed or retired, 10 (20%) were farmers, 2 (4%) were housewives, and 8 (16%) were classified into other employment categories. The recent outdoor activities before the onset of illness included farming for 32 case-patients (65%), plant collection for 5 (10%), forestry for 5 (10%), and hunting for 2 (4%). Underlying disease was reported in 31 case-patients (65%). Twenty-three (47%), 12 (24%), and 2 (4%) had hypertension, diabetes mellitus, and cancer, respectively.

One of 49 case-patients with SFTS was excluded from the subsequent analysis of clinical data because this person was not hospitalized. The following characteristics were analyzed based on the data of the 48 case-patients who were hospitalized. The median time from the onset of disease to the initial hospital visit was 3 days (IQR: 2–5). The median time from the onset to admission was 4 days (IQR: 2–5), and this period did not significantly differ between the fatal and the nonfatal cases ( $p = 0.61$ ,  $p = 0.29$ , respectively). The median time from the onset to death was 8 days (IQR: 5–11).

### Clinical Characteristics

The clinical characteristics of the 48 hospitalized case-patients at the time of admission are shown in Table 2. Most case-patients developed fever (94%). Traces of tick bite were found in only 21 case-patients (44%). Gastrointestinal symptoms such as diarrhea (71%), abdominal pain (38%), and nausea (29%) were frequent at admission in these case-patients. Neurological findings, such as disorientation (42%), muscle weakness (21%), tremor (8%), and seizure (2%), were also observed in these case-patients. The signs and symptoms at admission did not differ between the fatal and nonfatal cases (Table 2). By contrast, the percentages of patients

**Table 2. Clinical characteristics of 48 case-patients with severe fever with thrombocytopenia syndrome at admission grouped according to outcome in Japan.**

|                                       | At admission   |                   |                | RR   | 95% CI     | p-value* |
|---------------------------------------|----------------|-------------------|----------------|------|------------|----------|
|                                       | Total (n = 48) | Nonfatal (n = 33) | Fatal (n = 15) |      |            |          |
| Temperature $\geq 38^{\circ}\text{C}$ | 43 (90%)       | 29 (88%)          | 14 (93%)       | 1.06 | 0.88–1.28  | 1.00     |
| Fatigue                               | 40 (83%)       | 27 (82%)          | 13 (87%)       | 1.11 | 0.99–1.25  | 0.54     |
| Gastrointestinal symptoms             | 38 (79%)       | 26 (79%)          | 12 (80%)       |      |            |          |
| Diarrhea                              | 34 (71%)       | 24 (73%)          | 10 (67%)       | 0.98 | 0.66–1.45  | 1.00     |
| Abdominal pain                        | 18 (38%)       | 14 (42%)          | 4 (27%)        | 0.72 | 0.31–1.73  | 0.50     |
| Nausea                                | 14 (29%)       | 10 (30%)          | 4 (27%)        | 0.88 | 0.33–2.34  | 1.00     |
| Neurological symptoms                 | 25 (52%)       | 15 (45%)          | 10 (67%)       |      |            |          |
| Disorientation                        | 20 (42%)       | 11 (33%)          | 9 (60%)        | 1.64 | 0.87–3.06  | 0.20     |
| Muscle weakness                       | 10 (21%)       | 7 (21%)           | 3 (20%)        | 1.17 | 0.37–3.84  | 1.00     |
| Tremor                                | 4 (8%)         | 1 (3%)            | 3 (20%)        | 6.92 | 0.79–60.49 | 0.08     |
| Dysarthria                            | 2 (4%)         | 1 (3%)            | 1 (7%)         | 2.23 | 0.15–32.98 | 0.53     |
| Seizure                               | 1 (2%)         | 0 (0%)            | 1 (7%)         | –    | –          | –        |
| Trace of tick bite                    | 21 (44%)       | 19 (58%)          | 2 (13%)        | 0.38 | 0.11–1.30  | 0.05     |
| Lymphadenopathy                       | 19 (40%)       | 14 (42%)          | 5 (33%)        | 0.88 | 0.42–1.84  | 1.00     |
| Bleeding tendency                     | 10 (21%)       | 6 (18%)           | 4 (27%)        |      |            |          |
| Petechia                              | 4 (8%)         | 3 (9%)            | 1 (7%)         | 0.72 | 0.08–6.27  | 1.00     |
| Melena                                | 2 (4%)         | 2 (6%)            | 0 (0%)         | –    | –          | –        |
| Gingival bleeding                     | 1 (2%)         | 0 (0%)            | 1 (7%)         | –    | –          | –        |
| Arthralgia                            | 9 (19%)        | 8 (24%)           | 1 (7%)         | 0.35 | 0.05–2.46  | 0.40     |
| Headache                              | 9 (19%)        | 8 (24%)           | 1 (7%)         | 0.31 | 0.04–2.17  | 0.24     |
| Myalgia                               | 8 (17%)        | 6 (18%)           | 2 (13%)        | 0.88 | 0.21–3.72  | 1.00     |
| Hepatosplenomegaly                    | 2 (4%)         | 1 (3%)            | 1 (7%)         | 2.08 | 0.14–30.65 | 1.00     |

Note: Abbreviations. RR, risk ratio; CI, confidence interval

\*Fisher’s exact test

doi:10.1371/journal.pone.0165207.t002

exhibiting disorientation (23%), seizure (15%), and tremors (13%) were significantly higher in the fatal cases than in the nonfatal cases; the risk ratios were 1.94 for disorientation ( $p = 0.007$ ), 6.63 for seizure ( $p = 0.008$ ), and 3.46 for tremor ( $p = 0.04$ ) during the hospitalization (Table 3).

Five of the 48 hospitalized case-patients (10%) had complications of fungal infections. Pulmonary aspergillosis and oral candidiasis were diagnosed in 3 and 2 case-patients, respectively. One case of proven invasive aspergillosis was documented in a histopathological study [15], and the other two cases were probable invasive aspergillosis. No obvious pulmonary symptom was found at the time of admission for these three case-patients. The case-patient with proven invasive aspergillosis had a fatal outcome; the others survived. Corticosteroids were used in 4 of the 5 case-patients with fungal infection and in 24 of the 43 case-patients without fungal infection. No corticosteroids were used in 20 case-patients: 1 patient with fungal infection and 19 patients without fungal infection. The use of corticosteroid did not differ significantly between hospitalized case-patients with or without fungal infection ( $p = 0.58$ ).

### Laboratory Data

The laboratory findings of the 48 case-patients at admission are shown in Table 4. The median white blood cell (WBC) count and median platelet count were 1,725/ $\mu\text{L}$  (IQR: 1170–2668) and  $6.3 \times 10^4$ / $\mu\text{L}$  (IQR: 4.3–9.4), both of which were lower than the normal range. The platelet count differed between the fatal and nonfatal cases ( $p = 0.004$ ), but the WBC count did not

**Table 3. Clinical characteristics of 48 case-patients with severe fever with thrombocytopenia syndrome during hospitalization grouped according to outcome in Japan.**

|                                       | At admission and at any time during hospitalization |                   |                |      |            |          |
|---------------------------------------|-----------------------------------------------------|-------------------|----------------|------|------------|----------|
|                                       | Total (n = 48)                                      | Nonfatal (n = 33) | Fatal (n = 15) | RR   | 95% CI     | p-value* |
| Temperature $\geq 38^{\circ}\text{C}$ | 45 (94%)                                            | 31 (94%)          | 14 (93%)       | 0.99 | 0.85–1.17  | 1.00     |
| Fatigue                               | 40 (83%)                                            | 27 (82%)          | 13 (87%)       | 1.04 | 0.97–1.11  | 1.00     |
| Gastrointestinal symptoms             | 42 (88%)                                            | 28 (85%)          | 14 (93%)       |      |            |          |
| Diarrhea                              | 37 (77%)                                            | 25 (76%)          | 12 (80%)       | 1.13 | 0.85–1.51  | 0.70     |
| Abdominal pain                        | 19 (40%)                                            | 15 (45%)          | 4 (27%)        | 0.68 | 0.29–1.60  | 0.48     |
| Nausea                                | 17 (35%)                                            | 12 (36%)          | 5 (33%)        | 0.96 | 0.43–2.17  | 1.00     |
| Neurological symptoms                 | 34 (71%)                                            | 19 (58%)          | 15 (100%)      |      |            |          |
| Disorientation                        | 31 (65%)                                            | 16 (48%)          | 15 (100%)      | 1.94 | 1.38–2.72  | 0.0007   |
| Muscle weakness                       | 10 (21%)                                            | 7 (21%)           | 3 (20%)        | 1.13 | 0.35–3.61  | 1.00     |
| Tremor                                | 10 (21%)                                            | 4 (12%)           | 6 (40%)        | 3.46 | 1.17–10.24 | 0.04     |
| Dysarthria                            | 6 (13%)                                             | 3 (9%)            | 3 (20%)        | 2.23 | 0.52–9.61  | 0.35     |
| Seizure                               | 8 (17%)                                             | 2 (6%)            | 6 (40%)        | 6.63 | 1.48–27.94 | 0.008    |
| Lymphadenopathy                       | 22 (46%)                                            | 17 (52%)          | 5 (33%)        | 0.69 | 0.33–1.43  | 0.32     |
| Bleeding tendency                     | 19 (40%)                                            | 11 (33%)          | 8 (53%)        |      |            |          |
| Petechia                              | 16 (33%)                                            | 9 (27%)           | 8 (53%)        | 1.67 | 0.78–3.56  | 0.31     |
| Melena                                | 6 (13%)                                             | 4 (12%)           | 2 (13%)        | 1.04 | 0.21–4.99  | 1.00     |
| Gingival bleeding                     | 6 (13%)                                             | 3 (9%)            | 3 (20%)        | 2.31 | 0.53–9.96  | 0.35     |
| Arthralgia                            | 10 (21%)                                            | 9 (27%)           | 1 (7%)         | 0.36 | 0.05–2.46  | 0.40     |
| Headache                              | 9 (19%)                                             | 8 (24%)           | 1 (7%)         | 0.35 | 0.05–2.37  | 0.39     |
| Myalgia                               | 11 (23%)                                            | 9 (27%)           | 2 (13%)        | 0.64 | 0.17–2.49  | 0.70     |
| Hepatosplenomegaly                    | 6 (13%)                                             | 4 (12%)           | 2 (13%)        | 1.00 | 0.21–4.77  | 1.00     |

Note: Abbreviations. RR, risk ratio; CI, confidence interval

\*Fisher’s exact test

doi:10.1371/journal.pone.0165207.t003

**Table 4. Laboratory findings of 48 case-patients with severe fever with thrombocytopenia syndrome at admission grouped according to outcome in Japan.**

|          |                               | Normal range             | Total (n = 48) |        |           | Non-fatal (n = 33) |        |           | Fatal (n = 15) |        |           | p-value      |
|----------|-------------------------------|--------------------------|----------------|--------|-----------|--------------------|--------|-----------|----------------|--------|-----------|--------------|
|          |                               |                          | n              | Median | IQR       | n                  | Median | IQR       | n              | Median | IQR       |              |
| Hb       | (g/dL)                        | M: 13.7–16.8F: 11.6–14.8 | 48             | 14.0   | 12.0–14.9 | 33                 | 14.1   | 12.0–14.9 | 15             | 13.2   | 12.2–14.3 | 0.34         |
| WBC      | (/μL)                         | 3300–8600                | 48             | 1725   | 1170–2668 | 33                 | 1770   | 1400–2570 | 15             | 1290   | 965–2750  | 0.22         |
| Platelet | ( $\times 10^4/\mu\text{L}$ ) | 15.8–34.8                | 48             | 6.3    | 4.3–9.4   | 33                 | 7.1    | 5.8–9.9   | 15             | 4.2    | 2.4–6.5   | <b>0.004</b> |
| AST      | (IU/L)                        | 13–30                    | 48             | 125    | 80–252    | 33                 | 104    | 61–186    | 15             | 243    | 108–439   | <b>0.02</b>  |
| ALT      | (IU/L)                        | M: 10–42F: 7–23          | 48             | 55     | 39–108    | 33                 | 53     | 31–97     | 15             | 61     | 48–180    | 0.13         |
| LDH      | (IU/L)                        | 124–222                  | 47             | 431    | 351–908   | 32                 | 406    | 328–659   | 15             | 831    | 402–1064  | 0.06         |
| Albumin  | (g/dL)                        | 4.1–5.1                  | 48             | 3.4    | 3.1–3.8   | 33                 | 3.7    | 3.3–3.9   | 15             | 3.0    | 2.8–3.4   | <b>0.02</b>  |
| BUN      | (mg/dL)                       | 8–20                     | 48             | 22     | 17–29     | 33                 | 21     | 16–25     | 15             | 25.6   | 19.7–36.1 | 0.06         |
| Cr       | (mg/dL)                       | M: 0.65–1.07F: 0.46–0.79 | 48             | 0.93   | 0.70–1.13 | 33                 | 0.82   | 0.70–1.07 | 15             | 1.12   | 0.98–1.38 | <b>0.01</b>  |
| CRP      | (mg/dL)                       | 0.00–0.14                | 47             | 0.16   | 0.05–0.50 | 32                 | 0.14   | 0.05–0.36 | 15             | 0.27   | 0.04–0.78 | 0.35         |

Note: Abbreviations. n, number; IQR, interquartile range; M, male; F, female; Hb, hemoglobin; WBC, white blood cell; AST, aspartate aminotransferase; ALT, alanine aminotransferase; LDH, lactate dehydrogenase; BUN, blood urea nitrogen; Cr, creatinine; CRP, C-reactive protein

doi:10.1371/journal.pone.0165207.t004



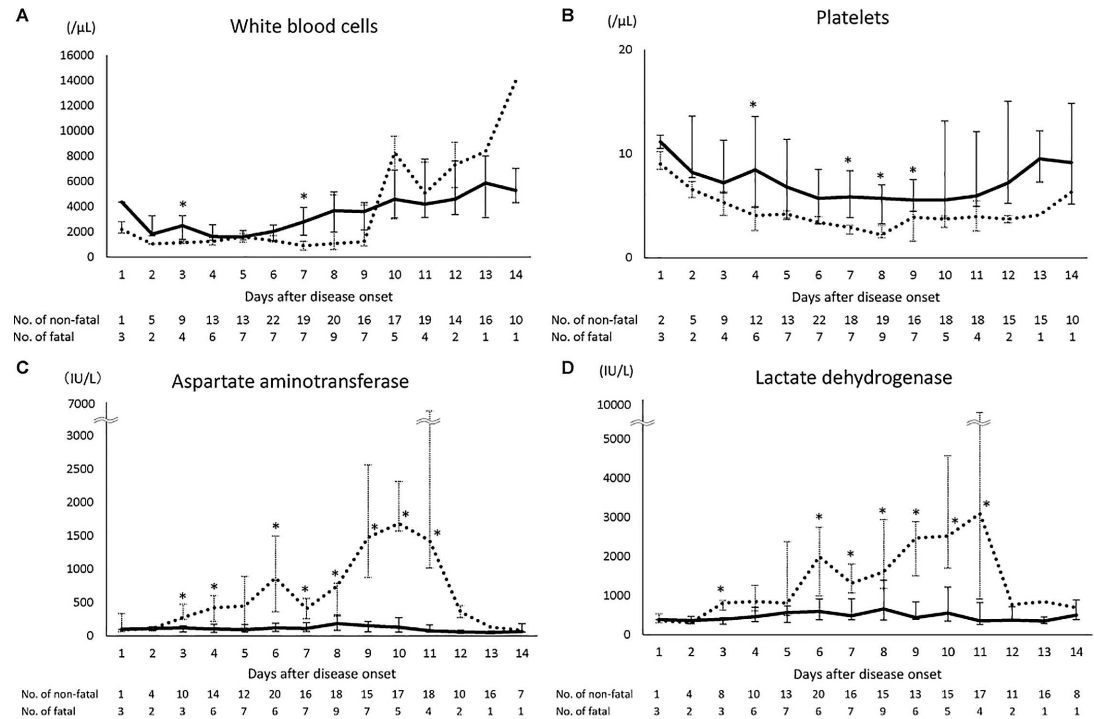

**Fig 1. Laboratory findings for SFTS cases.** White blood cells (A), platelets (B), aspartate aminotransferase concentration (C), and lactate dehydrogenase concentration (D) in nonfatal and fatal cases at the time of admission and during hospitalization. Laboratory data are shown as the median and interquartile range between the first and third quartiles. Solid lines indicate nonfatal cases and dotted lines indicate fatal cases. The numbers of nonfatal and fatal cases are indicated for each onset day below the graph. The normal ranges for each parameter are 3,500–9,000/ $\mu\text{L}$  for WBC count,  $15\text{--}35 \times 10^4/\mu\text{L}$  for platelet count, 10–35 IU/L for AST, and 120–220 IU/L for serum LDH. \*  $p < 0.05$  between nonfatal and fatal cases.

doi:10.1371/journal.pone.0165207.g001

differ between groups. The median serum C-reactive protein concentration was 0.16 mg/dL (IQR: 0.05–0.50). The concentrations of serum aspartate aminotransferase (AST) and creatinine were significantly higher in the fatal than in the nonfatal cases.

The laboratory data of the case-patients at the time of admission and during hospitalization are shown in Fig 1. WBC count differed significantly between the fatal and nonfatal case-patients at days 3 and 7. WBC counts tended to be lower in the fatal case-patients than in the nonfatal case-patients until day 9 but to then increase rapidly after day 10 in the fatal case-patients. Platelet count was significantly lower in the fatal case-patients than in the nonfatal case-patients on days 4 and 7–9. The serum AST and lactate dehydrogenase (LDH) concentrations were elevated above the normal range during hospitalization in both the fatal and nonfatal case-patients. The serum concentrations were significantly higher in the fatal case-patients than in the nonfatal case-patients on days 3, 4, and 6–11 for AST and on days 3 and 6–11 for LDH. In addition, serial concentrations of serum AST and LDH for fifteen fatal case-patients are shown in Fig 2. The serum AST and LDH concentrations progressively increased in nine (60%) and ten (67%) of these case-patients during their clinical course, respectively. Especially in two case-patients, the concentrations of these enzymes dramatically increased before their deaths. Hemophagocytosis was observed in 15 of the 18 case-patients (83%) whose bone marrow samples were tested for pathology.

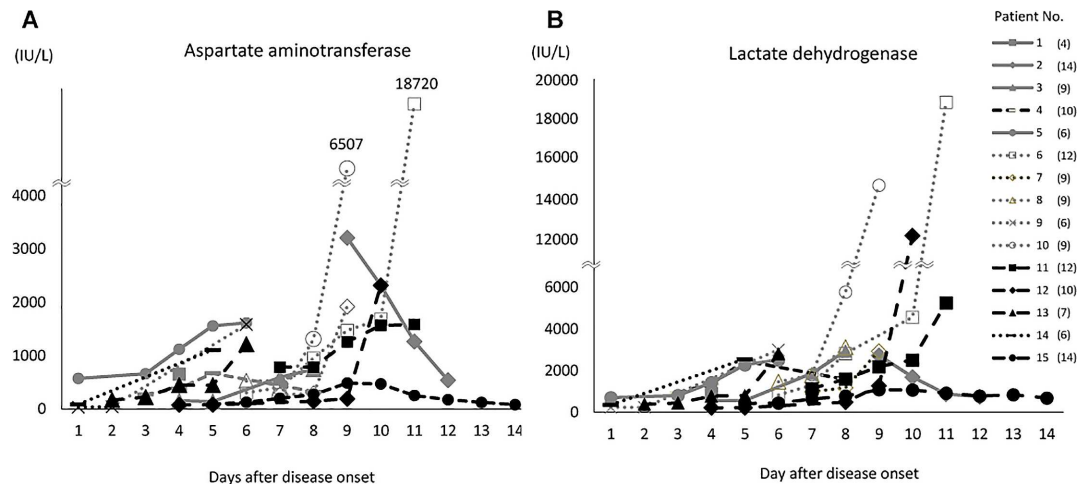

**Fig 2.** Serial concentrations of aspartate aminotransferase (A) and lactate dehydrogenase (B) in 15 fatal SFTS cases during hospitalization. The number in parenthesis of each patient indicates the days after disease onset when each patient died. A single result was available for the patient no.1. The normal ranges for each parameter are 10–35 IU/L for AST, and 120–220 IU/L for serum LDH.

doi:10.1371/journal.pone.0165207.g002

## Discussion

The incidence of SFTS (0.05 cases/100,000 person-years) found in Japan is similar to that in South Korea (0.07 cases/100,000 person-years) [16] but much lower than that in China (0.12–0.73/100,000 person-years) [17]. In our retrospective study, the median age of the 49 included patients was 78 years, which was much higher than in the reports from China (50–60 years) [18,19] and South Korea (69 years) [16]. The current median age of the whole population is higher in Japan (45.9 years) than in China (35.4 years) and South Korea (39.4 years) [20]. In addition, one fourth of the Japanese population was older than 65 years of age in 2013 [21]. Therefore, the findings of the present study may reflect the higher proportion of aged people among the population in Japan.

SFTS cases have been detected between the spring and summer in Japan. A similar seasonality was found in China [3,19] and South Korea [16]. A study from South Korea reported that the infection rate of SFTSV among ticks was higher in nymphs and adults [7]. Another study demonstrated that SFTSV was detected in ticks collected between April and September in South Korea [22]. Because human rural activities, such as hiking and camping, tend to increase from spring to summer [3], these two factors, the nature of ticks and human activities, may explain the seasonality of SFTS infection in humans.

Most case-patients were retired or unemployed, or farmers, and undertook outdoor activities such as farming or plant collection within 2 weeks before the onset of illness. Collectively, our data suggest these aged people in the western region of Japan experienced tick bites during their latest outdoor activities and consequently acquired SFTSV infection. This distribution is consistent with that for *A. testudinarius* in Japan [23], which suggests that *A. testudinarius* is one possible vector of SFTSV in Japan. Because *H. longicornis* was found widely in Japan [24], SFTS cases may emerge in the eastern regions of Japan in the future.

The case-fatality proportion (31%) in our study is higher than the 7.3–12.2% in recent reports from China [3,25], and lower than the 46% reported from South Korea [16]. Several reasons may explain the high case-fatality proportion in Japan. First, most of the patients in Japan were of advanced age, and two thirds of them had underlying diseases. Second, the interim case definition might have biased the reported cases toward clinically severe conditions



[12]. Although serological assays were available for laboratory diagnosis in some local health laboratories, no case was diagnosed by serological assays in this study. Third, the lack of serological testing may have failed to detect mild cases in our analysis, although a mild case of SFTS has been reported in Japan [26].

It was demonstrated that most of the SFTSV isolated from Japanese and Chinese cases formed independent clades, Japanese clade consisted of genotypes J1, J2, J3 and Chinese clade consisted of genotypes C1 to C5, respectively [27]. However, some SFTSV isolated from Japanese cases belonged to Chinese clade (genotypes C4 and C5), while the SFTSV isolated from Chinese cases belonged to the Japanese clade (J3). Amino acid homology in RNA-dependent RNA polymerase, glycoprotein, and nucleocapsid protein within the Japanese genotypes were over 98%, suggesting that there seems to be no association between severity of the disease and the genotypes.

About 50% of the patients exhibited neurological abnormalities at admission, and significant difference was found in neurological findings during hospitalization between the fatal and nonfatal cases. A previous study also reported that the presence of neurological manifestations was an independent predictor of the risk for severe disease in Northeast China [25]. We also found significant increases of the serum AST and LDH concentrations in the fatal case-patients during hospitalization, but the increases of these serum enzymes were not found in all fatal case-patients in this study. However, the serum AST and LDH concentrations may be important biomarkers of clinical outcome, which is in agreement with previous reports [28,29].

Interestingly, fungal infections such as invasive aspergillosis were found in 10% of these case-patients. We found no significant effects of treatment with corticosteroids on the complications of fungal infections among our case-patients. Decreases in WBC and CD4 T-cell counts have been reported during the acute phase of SFTS [30], and it is possible that the complication of invasive fungal infection observed in our case-patients may be explained, at least in part, by SFTSV-induced immunosuppression during the acute phase.

Although it has been suggested that SFTSV-induced thrombocytopenia is caused by the clearance of circulating virus-bound platelets by splenic macrophages in a mouse model [31], no statistical difference was found in the platelet counts between 15 cases with hemophagocytosis and three cases without hemophagocytosis.

None of the treatments, including ribavirin for SFTS, appears to be effective [29]. However, favipiravir, which was used in humans as an antiviral agent against influenza virus [32], has been reported to be effective against SFTSV infection in a murine model [33]. The effect of favipiravir in the treatment of SFTSV infections using an interferon alpha receptor knockout mouse model was demonstrated when it was administered within 5 days postinfection, while the median time from onset to death of fatal cases was 8 days in our cases. Favipiravir is expected to have an efficacy in the treatment of SFTS; however, to evaluate this, a clinical study in which favipiravir should be administered to the case-patients exhibiting clinical predictors such as neurological abnormalities as soon as possible, is required.

This study has several limitations. First, 49 (51%) of the 96 reported cases were included in this study, but they may not represent the population of interest. Second, the case-fatality proportion might have been overestimated, as discussed above. Third, we cannot exclude the effects of confounding factors on the risk of death because of the limited number of case-patients. Further studies, including case-control studies, are required to identify the risk factors for SFTSV infection in Japan.

In conclusion, most confirmed cases of SFTS reported between April and August in 2013 and 2014 were found in the western region of Japan. Most of the case-patients were of advanced age, and the case-fatality proportion was 31%. Most case-patients had a history of outdoor activity within 2 weeks before the onset of illness. Local residents should try to avoid

tick bites during their outdoor activities. The high percentage of patients with neurological abnormalities in the fatal cases during hospitalization suggests that these clinical findings may be useful for clinicians to monitor and predict the prognosis of SFTS.

## Ethical Approval

The research protocol was approved by the research and ethics committees of NIID (no. 549). This study was carried out according to the principles expressed in the Declaration of Helsinki. The patient or guardian provided written informed consent for all cases.

## Supporting Information

**S1 Fig. Geographic distribution of 96 cases of SFTS reported to the National Epidemiological Surveillance of Infectious Diseases in Japan between March 2013 and September 2014.**

The prefectures where the cases were reported are shown in gray.  
(PPTX)

**S2 Fig. Epidemic curve of 96 cases of SFTS reported to the National Epidemiological Surveillance of Infectious Diseases in Japan between March 2013 and September 2014.**

(PPTX)

**S1 Table. Geographical distribution of 96 cases of severe fever with thrombocytopenia syndrome reported to National Epidemiological Surveillance of Infectious Diseases.**

(DOCX)

**S2 Table. Basic characteristics of 96 case-patients with severe fever with thrombocytopenia syndrome reported to National Epidemiological Surveillance of Infectious Diseases.**

(DOCX)

## Acknowledgments

We thank the members of SFTS Epidemiological Research Group-Japan and the staff at local public health centers and prefectural and municipal public health institutes.

Members of the SFTS Epidemiological Research Group-Japan: In addition to HK, TY, TS, TM, MShimajima, MSaijo, KO, the member of the SFTS Epidemiological Research Group-Japan are; Michio Abe (Minamata City General Hospital and Medical Center), Masafumi Wada (Kamiamakusa City Hospital), Kunihiko Umekita (University of Miyazaki Hospital), Masahiro Kamekou (Kanoya-iryucenter), Daisuke Tanioka (National Hospital Organization Iwakuni Clinical Center), Isao Sanada (Arao Municipal Hospital), Toshio Kuwai (National Hospital Organization Kure Medical Center), Yasuhiro Tanaka, Kouta Shigetou (National Hospital Organization Ibusuki Medical Center), Yoshito Homma, Chie Yamamoto (Ehime Prefectural Central Hospital), Miki Yamauchi (Nagasaki Prefecture Tsushima Hospital), Shunsuke Hayashi (Shuto General Hospital), Shinya Watanabe (Okayama Kyoritsu General Hospital), Akihito Kitao, Hiroki Takatsu, (Toyooka Public Hospital), Yoshinori Nakanishi (Kokushima Prefecture Naruto Hospital), Kunishiko Koguro (Jichi Medical University Hospital), Mitsuaki Watanabe (Saiseikai Hiroshima Hospital), Natsumi Uehara (Miyazaki Prefectural Nobeoka Hospital), Masahiko Kaneko (Uwajima City Hospital), Atsushi Yamanaka (Miyazaki Prefectural Miyazaki Hospital), Yuichi Murakami (Kitaishikai Hospital), Tatsuya Konishi, Aiko Sakamoto (Matsuyama Red Cross Hospital), Masaki Harada (Harada Clinic), Kaoru Yamamoto (National Hospital Organization Kanmon Medical Center), Tadashi Hayashi (Hayashi Clinic), Noriyasu Kondo (Katsuura Hospital), Koichiro Suemori (Ehime University Hospital), Takashi Ogawa (Shimanto City Hospital), Risa Nakazawa (Kochi Prefectural

Hata Kenmin Hospital), Yumi Yamamoto (Nagasaki University Hospital), Masaharu Miyahara (Karatsu Red Cross Hospital), Takanori Senba (Yawatahama City General Hospital), Tomoko Maruhashi (Tokushima University Hospital), Shuetsu Fukushi, Hideki Tani, Tomoki Yoshikawa, Shigeru Morikawa (NIID).

## Author Contributions

**Conceptualization:** TY.

**Data curation:** TY HK.

**Formal analysis:** TY HK.

**Funding acquisition:** MSa KO.

**Investigation:** TY HK.

**Methodology:** TY HK.

**Project administration:** MSa KO.

**Resources:** MSh MSa KO.

**Software:** TY HK.

**Supervision:** KO.

**Validation:** TY TS TM KO.

**Visualization:** HK.

**Writing – original draft:** TY HK KO.

**Writing – review & editing:** TS TM MSa KO.

## References

1. Xu B, Liu L, Huang X, Ma H, Zhang Y, Du Y, et al. Metagenomic analysis of fever, thrombocytopenia and leukopenia syndrome (FTLS) in Henan Province, China: discovery of a new bunyavirus. *PLoS Pathog.* 2011; 7(11): e1002369. doi: [10.1371/journal.ppat.1002369](https://doi.org/10.1371/journal.ppat.1002369) PMID: [22114553](https://pubmed.ncbi.nlm.nih.gov/22114553/)
2. Yu X-J, Liang M-F, Zhang S-Y, Liu Y, Li J-D, Sun Y-L, et al. Fever with thrombocytopenia associated with a novel bunyavirus in China. *N Engl J Med.* 2014; 364:1523–1532.
3. Liu Q, He B, Huang S-Y, Wei F, Zhu X-Q. Severe fever with thrombocytopenia syndrome, an emerging tick-borne zoonosis. *Lancet Infect Dis.* 2014; 14:763–772. doi: [10.1016/S1473-3099\(14\)70718-2](https://doi.org/10.1016/S1473-3099(14)70718-2) PMID: [24837566](https://pubmed.ncbi.nlm.nih.gov/24837566/)
4. Takahashi T, Maeda K, Suzuki T, Ishido A, Shigeoka T, Tominaga T, et al. The first identification and retrospective study of severe fever with thrombocytopenia syndrome in Japan. *J Infect Dis.* 2014; 209:816–827. doi: [10.1093/infdis/jit603](https://doi.org/10.1093/infdis/jit603) PMID: [24231186](https://pubmed.ncbi.nlm.nih.gov/24231186/)
5. Kim KH, Yi J, Kim G, Choi SJ, Jun KI, Kim N-H, et al. Severe fever with thrombocytopenia syndrome, South Korea, 2012. *Emerg Infect Dis* 2013; 19: 1892–1894. doi: [10.3201/eid1911.130792](https://doi.org/10.3201/eid1911.130792) PMID: [24206586](https://pubmed.ncbi.nlm.nih.gov/24206586/)
6. Luo L-M, Zhao L, Wen H-L, Zhang Z-T, Liu J-W, Fang L-Z, et al. *Haemaphysalis longicornis* ticks as reservoir and vector of severe fever with thrombocytopenia syndrome virus in China. *Emerg Infect Dis.* 2015; 21: 1770–1776. doi: [10.3201/eid2110.150126](https://doi.org/10.3201/eid2110.150126) PMID: [26402039](https://pubmed.ncbi.nlm.nih.gov/26402039/)
7. Yun S-M, Lee W-G, Ryou J, Yang S-C, Park S-W, Roh JY, et al. Severe fever with thrombocytopenia syndrome virus in ticks collected from humans, South Korea, 2013. *Emerging Infect Dis.* 2014; 20:1358–1361. doi: [10.3201/eid2008.131857](https://doi.org/10.3201/eid2008.131857) PMID: [25061851](https://pubmed.ncbi.nlm.nih.gov/25061851/)
8. Bao CJ, Guo XL, Qi X, Hu JL, Zhou MH, Varma JK, et al. A family cluster of infections by a newly recognized bunyavirus in Eastern China, 2007: Further evidence of person-to-person transmission. *Clin Infect Dis.* 2011; 53:1208–1214. doi: [10.1093/cid/cir732](https://doi.org/10.1093/cid/cir732) PMID: [22028437](https://pubmed.ncbi.nlm.nih.gov/22028437/)

9. Gai Z, Liang M, Zhang Y, Zhang S, Jin C, Wang S-W, et al. Person-to-person transmission of severe fever with thrombocytopenia syndrome bunyavirus through blood contact. *Clin Infect Dis*. 2012; 54:249–252. doi: [10.1093/cid/cir776](https://doi.org/10.1093/cid/cir776) PMID: [22095565](https://pubmed.ncbi.nlm.nih.gov/22095565/)
10. Tang X, Wu W, Wang H, Du Y, Liu L, Kang K, et al. Human-to-human transmission of severe fever with thrombocytopenia syndrome bunyavirus through contact with infectious blood. *J Infect Dis*. 2013; 207:736–739. doi: [10.1093/infdis/jis748](https://doi.org/10.1093/infdis/jis748) PMID: [23225899](https://pubmed.ncbi.nlm.nih.gov/23225899/)
11. Kim WY, Choi W, Park S-W, Wang EB, Lee W-J, Jee Y, et al. Nosocomial transmission of severe fever with thrombocytopenia syndrome in Korea. *Clin Infect Dis*. 2015; 60:1681–1683. doi: [10.1093/cid/civ128](https://doi.org/10.1093/cid/civ128) PMID: [25694652](https://pubmed.ncbi.nlm.nih.gov/25694652/)
12. Saito T, Fukushima K, Umeki K, Nakajima K. Severe fever with thrombocytopenia syndrome in Japan and public health communication. *Emerg Infect Dis*. 2015; 21:487–489. doi: [10.3201/eid2103.140831](https://doi.org/10.3201/eid2103.140831) PMID: [25695132](https://pubmed.ncbi.nlm.nih.gov/25695132/)
13. Morrissey CO, Chen SC, Sorrell TC, Milliken S, Bardy PG, Bradstock KF, et al. Galactomannan and PCR versus culture and histology for directing use of antifungal treatment for invasive aspergillosis in high-risk haematology patients: a randomised controlled trial. *Lancet Infect Dis*. 2013; 519–528. doi: [10.1016/S1473-3099\(13\)70076-8](https://doi.org/10.1016/S1473-3099(13)70076-8) PMID: [23639612](https://pubmed.ncbi.nlm.nih.gov/23639612/)
14. Yoshikawa T, Fukushi S, Tani H, Fukuma A, Taniguchi S, Toda S, et al. Sensitive and specific PCR systems for detection of both Chinese and Japanese severe fever with thrombocytopenia syndrome virus strains and prediction of patient survival based on viral load. *J Clin Microbiol*. 2015; 52:3325–3333.
15. Hiraki T, Yoshimitsu M, Suzuki T, Goto Y, Higashi M, Yokoyama S, et al. Two autopsy cases of severe fever with thrombocytopenia syndrome (SFTS) in Japan: a pathognomonic histological feature and unique complication of SFTS. *Pathol Int*. 2014; 64:569–575. doi: [10.1111/pin.12207](https://doi.org/10.1111/pin.12207) PMID: [25329676](https://pubmed.ncbi.nlm.nih.gov/25329676/)
16. Shin J, Kwon D, Youn SK, Park JH. Characteristics and factors associated with death among patients hospitalized for severe fever with thrombocytopenia syndrome, South Korea, 2013. *Emerg Infect Dis*. 2015; 21:1704–1710. doi: [10.3201/eid2110.141928](https://doi.org/10.3201/eid2110.141928) PMID: [26402575](https://pubmed.ncbi.nlm.nih.gov/26402575/)
17. Liu K, Zhou H, Sun R-X, Yao H-W, Li Y, Wang L-P, et al. A national assessment of the epidemiology of severe fever with thrombocytopenia syndrome, China. *Sci Rep*. 2015; 5:9679. doi: [10.1038/srep09679](https://doi.org/10.1038/srep09679) PMID: [25902910](https://pubmed.ncbi.nlm.nih.gov/25902910/)
18. Ding F, Guan X-H, Kang K, Ding S-J, Huang L-Y, Xing X-S, et al. Risk factors for bunyavirus-associated severe fever with thrombocytopenia syndrome, China. *PLoS Negl Trop Dis*. 2014; 8(10):e3267. doi: [10.1371/journal.pntd.0003267](https://doi.org/10.1371/journal.pntd.0003267) PMID: [25330383](https://pubmed.ncbi.nlm.nih.gov/25330383/)
19. Sun J, Chai C, Lv H, Lin J, Wang C, Chen E, et al. Epidemiological characteristics of severe fever with thrombocytopenia syndrome in Zhejiang Province, China. *Int J Infect Dis*. 2014; 25:180–185. doi: [10.1016/j.ijid.2014.02.022](https://doi.org/10.1016/j.ijid.2014.02.022) PMID: [24947422](https://pubmed.ncbi.nlm.nih.gov/24947422/)
20. United Nations. World Population Prospects: The 2012 Revision. ([http://esa.un.org/unpd/wpp/publications/Files/WPP2012\\_HIGHLIGHTS.pdf](http://esa.un.org/unpd/wpp/publications/Files/WPP2012_HIGHLIGHTS.pdf); 30 April, 2016)
21. Statistics Bureau, Ministry of Internal Affairs and Communication. Current Population Estimates (as of October 1, 2013). (<http://www.stat.go.jp/english/data/jinsui/2013np/index.htm>; 30 April, 2016)
22. Park SW, Song BG, Shin EH, Yun SM, Han MG, Park MY, et al. Prevalence of severe fever with thrombocytopenia syndrome virus in *Haemaphysalis longicornis* ticks in South Korea. *Ticks Tick Borne Dis*. 2014; 5: 975–977. doi: [10.1016/j.ttbdis.2014.07.020](https://doi.org/10.1016/j.ttbdis.2014.07.020) PMID: [25164614](https://pubmed.ncbi.nlm.nih.gov/25164614/)
23. Fournier PE, Fujita H, Takada N, Raoult D. Genetic identification of rickettsiae isolated from ticks in Japan. *J Clin Microbiol*. 2002; 40:2176–2181. doi: [10.1128/JCM.40.6.2176-2181.2002](https://doi.org/10.1128/JCM.40.6.2176-2181.2002) PMID: [12037083](https://pubmed.ncbi.nlm.nih.gov/12037083/)
24. Hoogstraal H, Roberts FH, Kohls GM, Tipton VJ. Review of *Haemaphysalis (kaiseriana) longicornis* Neumann (resurrected) of Australia, New Zealand, New Caledonia, Fiji, Japan, Korea, and Northeastern China and USSR, and its parthenogenetic and bisexual populations (Ixodoidea, Ixodidae). *J Parasitol*. 1968; 54:1197–1213. PMID: [5757695](https://pubmed.ncbi.nlm.nih.gov/5757695/)
25. Deng B, Zhou B, Zhang S, Zhu Y, Han L, Geng Y, et al. Clinical features and factors associated with severity and fatality among patients with severe fever with thrombocytopenia syndrome bunyavirus infection in Northeast China. *PLoS One*. 2013; 8(11):e80802. doi: [10.1371/journal.pone.0080802](https://doi.org/10.1371/journal.pone.0080802) PMID: [24236203](https://pubmed.ncbi.nlm.nih.gov/24236203/)
26. Ohagi Y, Tamura S, Nakamoto C, Nakamoto H, Saijo M, Shimojima M, et al. Mild clinical course of severe fever with thrombocytopenia syndrome virus infection in an elderly Japanese patient. *Case Rep Infect Dis*. 2014; 2014:918135. doi: [10.1155/2014/918135](https://doi.org/10.1155/2014/918135) PMID: [25574405](https://pubmed.ncbi.nlm.nih.gov/25574405/)
27. Yoshikawa T, Shimojima M, Fukushi S, Tani H, Taniguchi S, Sign H, et al. Phylogenetic and geographic relationships of severe fever with thrombocytopenia syndrome virus in China, South Korea, and Japan. *J Infect Dis*. 2015; 212: 889–898. doi: [10.1093/infdis/jiv144](https://doi.org/10.1093/infdis/jiv144) PMID: [25762790](https://pubmed.ncbi.nlm.nih.gov/25762790/)

28. Cui N, Bao XL, Yang ZD, Lu QB, Hu CY, Wang LY, et al. Clinical progression and predictors of death in patients with severe fever with thrombocytopenia syndrome in China. *J Clin Virol*. 2014; 59:12–17. doi: [10.1016/j.jcv.2013.10.024](https://doi.org/10.1016/j.jcv.2013.10.024) PMID: [24257109](https://pubmed.ncbi.nlm.nih.gov/24257109/)
29. Gai Z-T, Zhang Y, Liang M-F, Jin C, Zhang C, Zhu C-B, et al. Clinical progress and risk factors for death in severe fever with thrombocytopenia syndrome patients. *J Infect Dis*. 2012; 206: 1095–1102. doi: [10.1093/infdis/jjs472](https://doi.org/10.1093/infdis/jjs472) PMID: [22850122](https://pubmed.ncbi.nlm.nih.gov/22850122/)
30. Weng Y, Chen N, Han Y, Xing Y, Li J. Clinical and laboratory characteristics of severe fever with thrombocytopenia syndrome in Chinese patients. *Braz J Infect Dis*. 2014; 18:88–91. doi: [10.1016/j.bjid.2013.05.011](https://doi.org/10.1016/j.bjid.2013.05.011) PMID: [24076112](https://pubmed.ncbi.nlm.nih.gov/24076112/)
31. Jin C, Liang M, Ning J, Gu W, Jiang H, Wu W, et al. Pathogenesis of emerging severe fever with thrombocytopenia syndrome virus in C57/BL6 mouse model. *Proc Natl Acad Sci USA*. 2012; 109:10053–10058. doi: [10.1073/pnas.1120246109](https://doi.org/10.1073/pnas.1120246109) PMID: [22665769](https://pubmed.ncbi.nlm.nih.gov/22665769/)
32. Furuta Y, Gowen BB, Takahashi K, Shiraki K, Smee DF, Barnard DL. Favipinavir (T-705), a novel viral RNA polymerase inhibitor. *Antiviral Res*. 2013; 100:446–454. doi: [10.1016/j.antiviral.2013.09.015](https://doi.org/10.1016/j.antiviral.2013.09.015) PMID: [24084488](https://pubmed.ncbi.nlm.nih.gov/24084488/)
33. Tani H, Fukuma A, Fukushi S, Taniguchi S, Yoshikawa T, Iwata-Yoshikawa N, et al. Treatment of infections with lethal severe fever with thrombocytopenia. *mSphere*. 2016; 1(1):e00061–15. doi: [10.1128/mSphere.00061-15](https://doi.org/10.1128/mSphere.00061-15) PMID: [27303697](https://pubmed.ncbi.nlm.nih.gov/27303697/)
